# Supplementary material
Source: publisher figshare collection journal article supplement (https://tandf.figshare.com/ndownloader/files/22421655)

## Supplementary Information

### Response of the barrier island coastal region of southwestern Nigeria to climate and non-climate forcing

IB Danladi, M Gül and E Ateş

*African Journal of Marine Science* 2020, 42(1): 43–51

<https://doi.org/10.2989/1814232X.2020.1727953>

**Supplementary Figure S1:** Satellite images showing changes to the Barrier Island Coast of southwestern Nigeria, 1973–2017. The 23 maps correspond to the coastal sections indicated in Figure 2 of the main article. Changes are colour-coded according to the year in which the Landsat images were taken

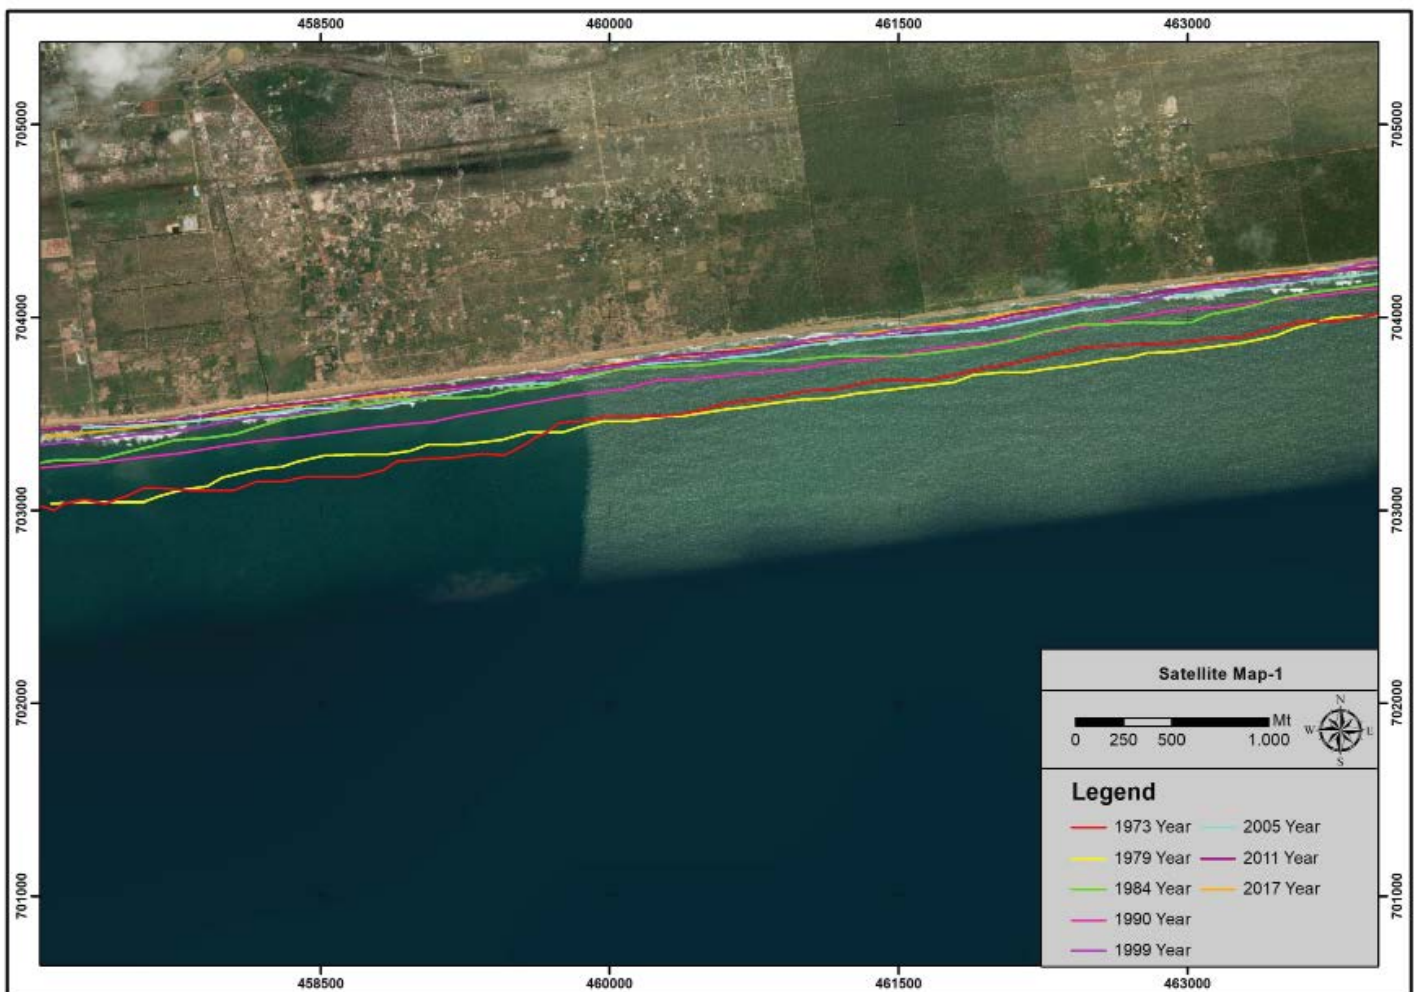

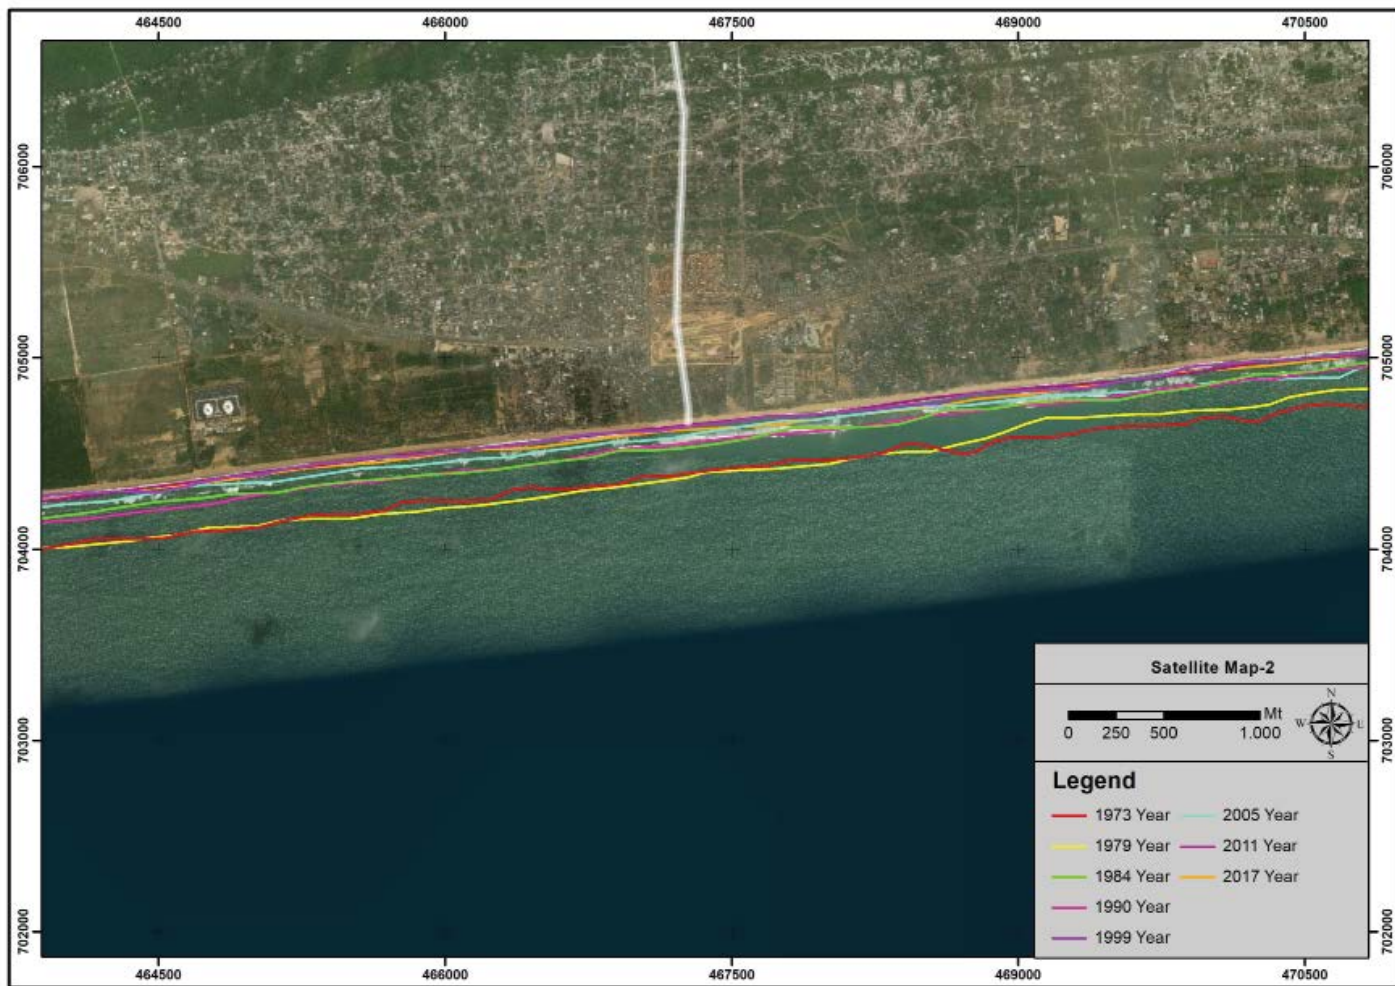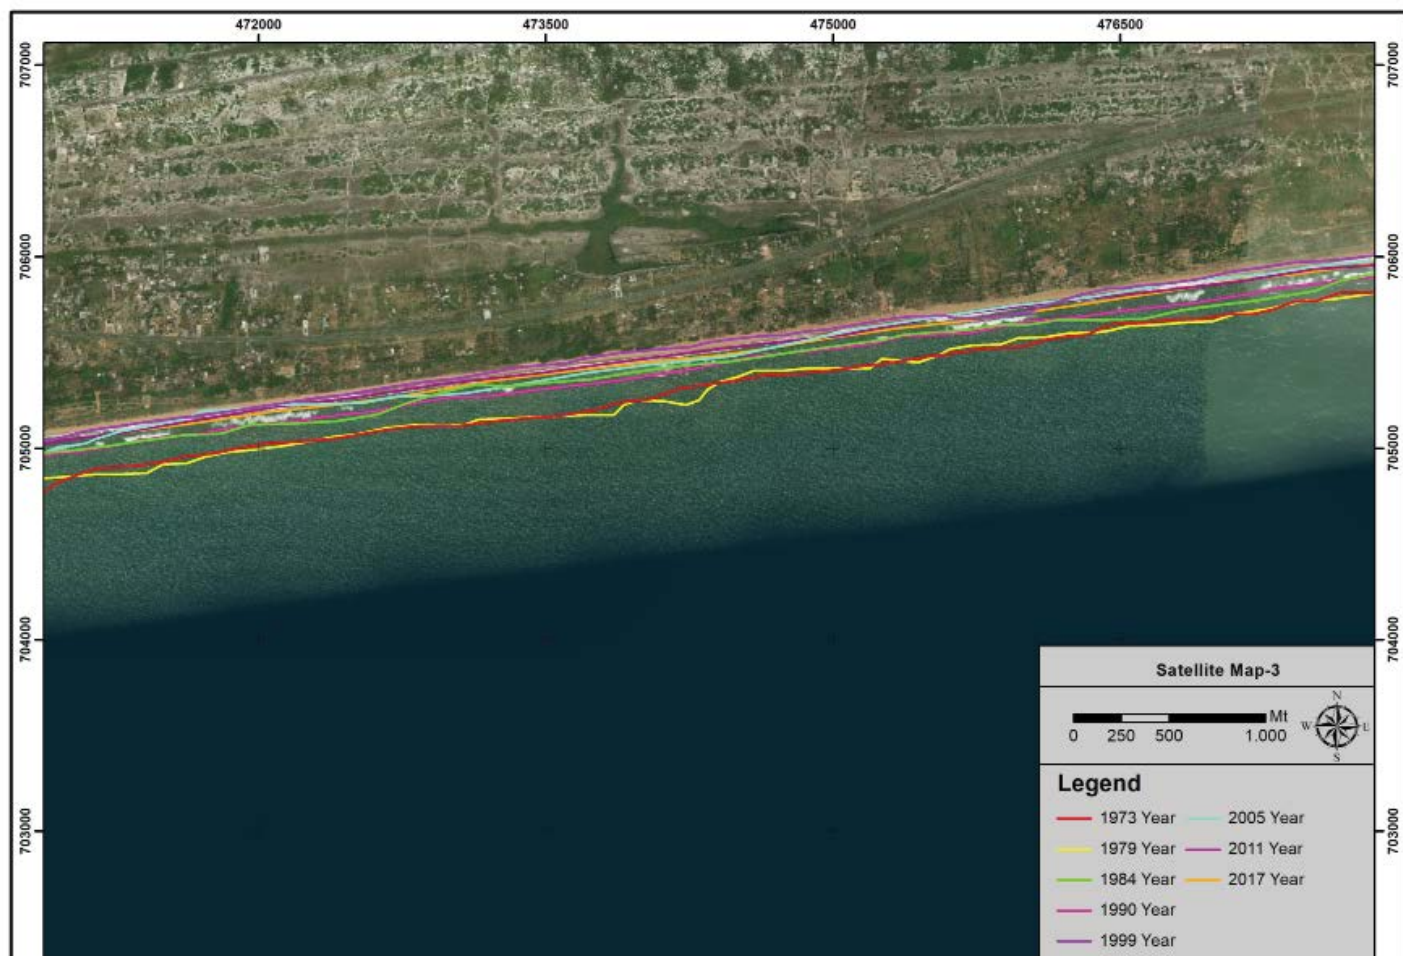

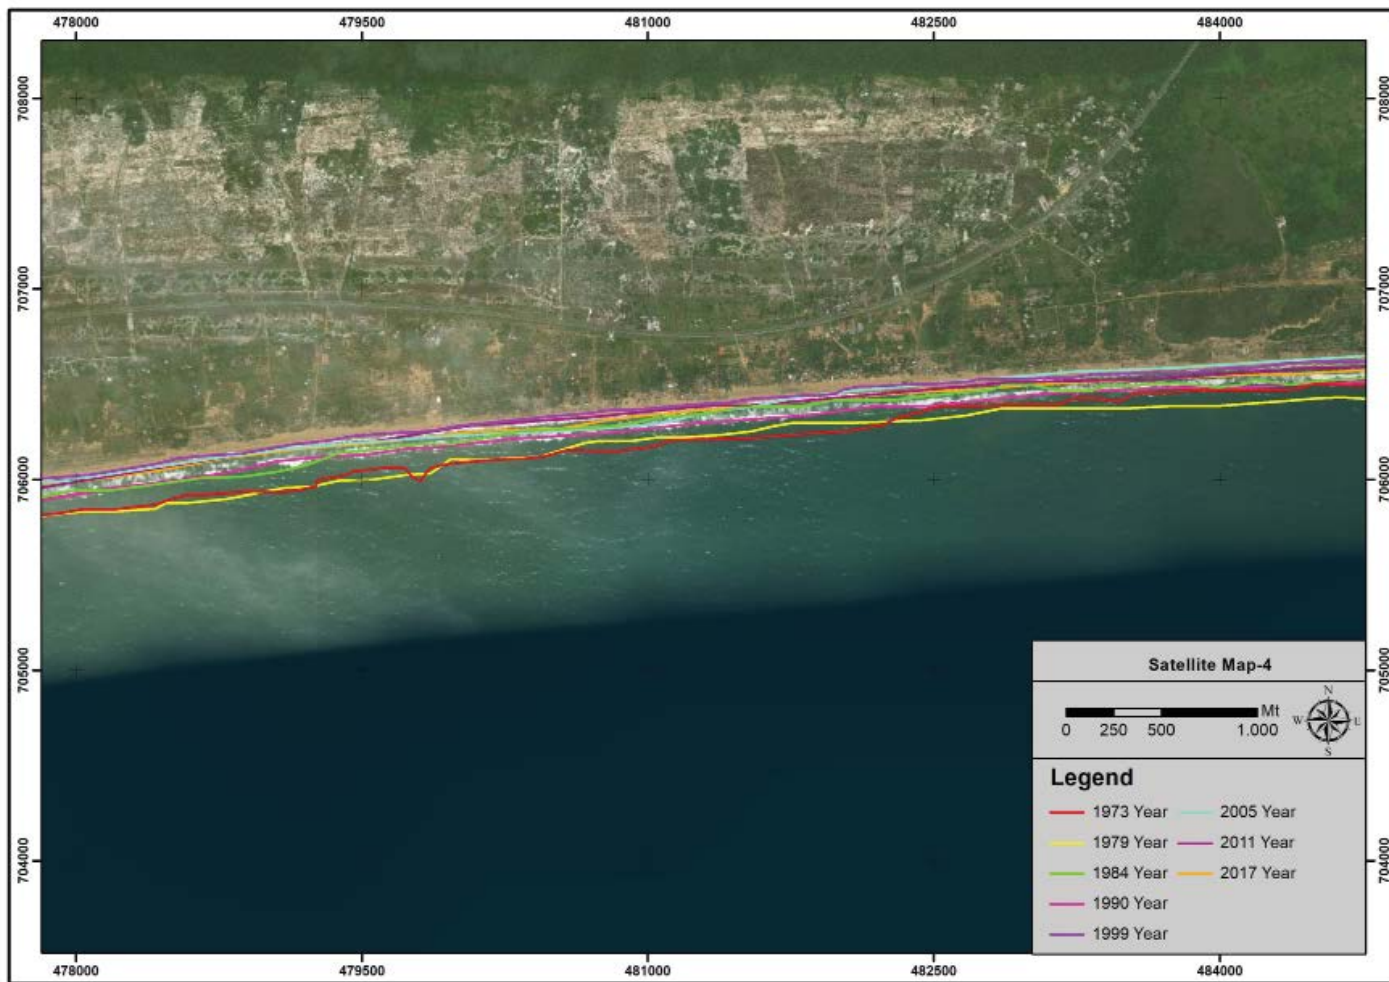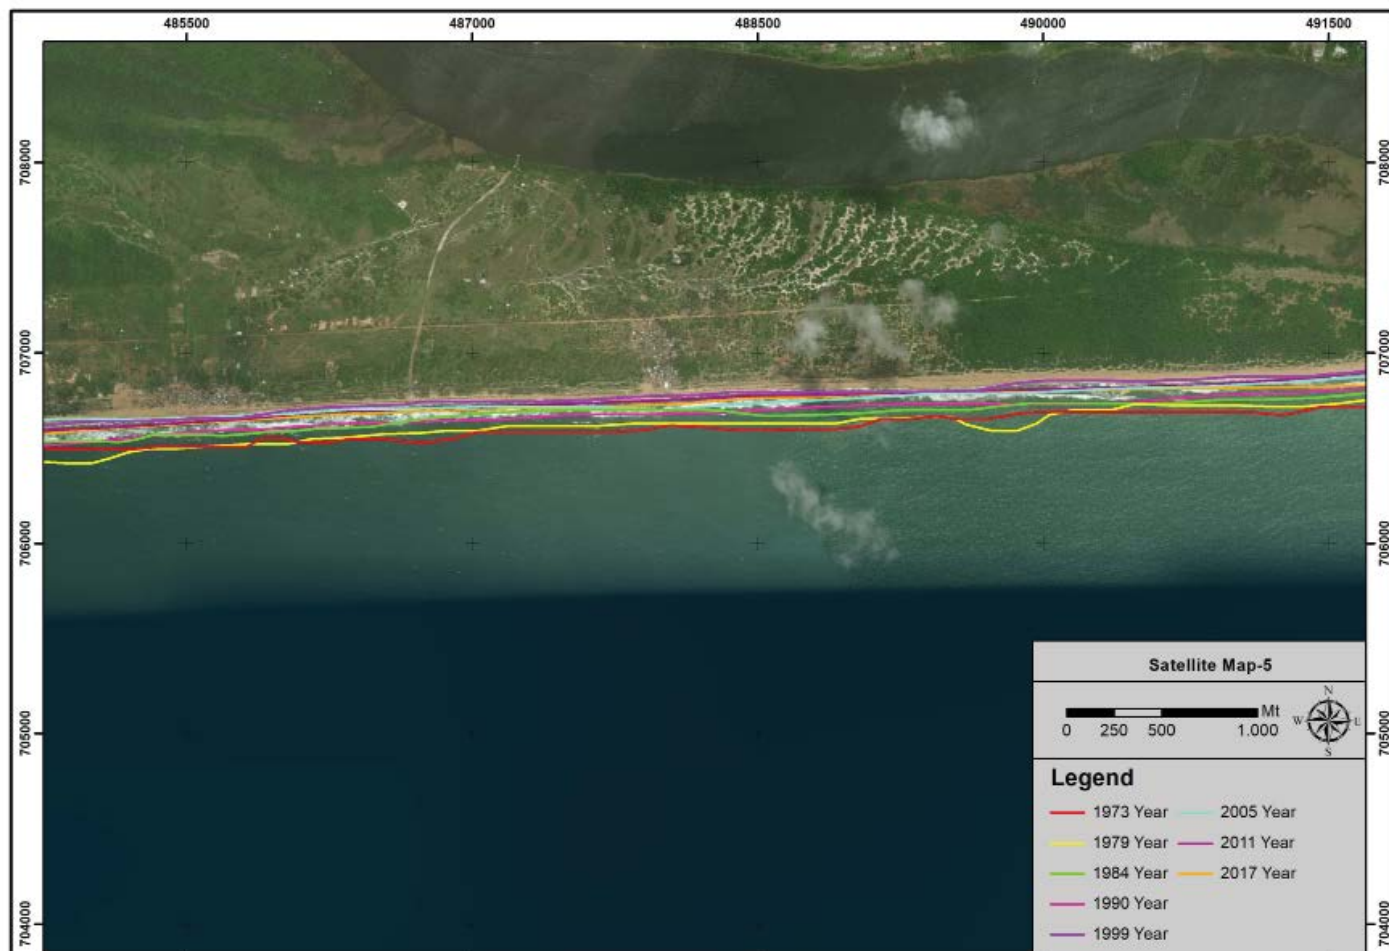

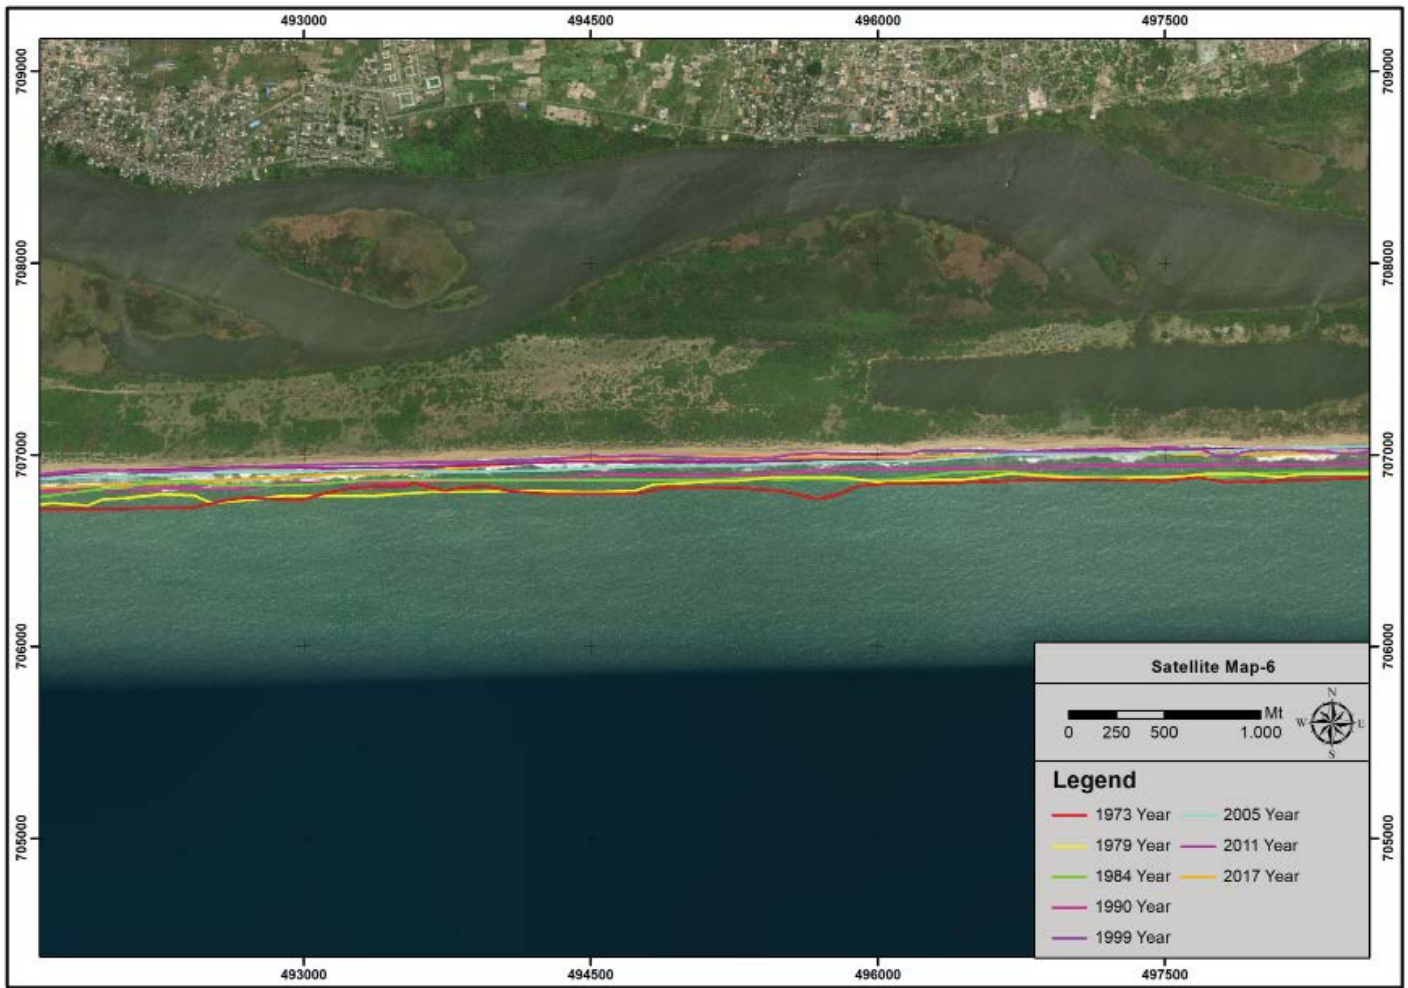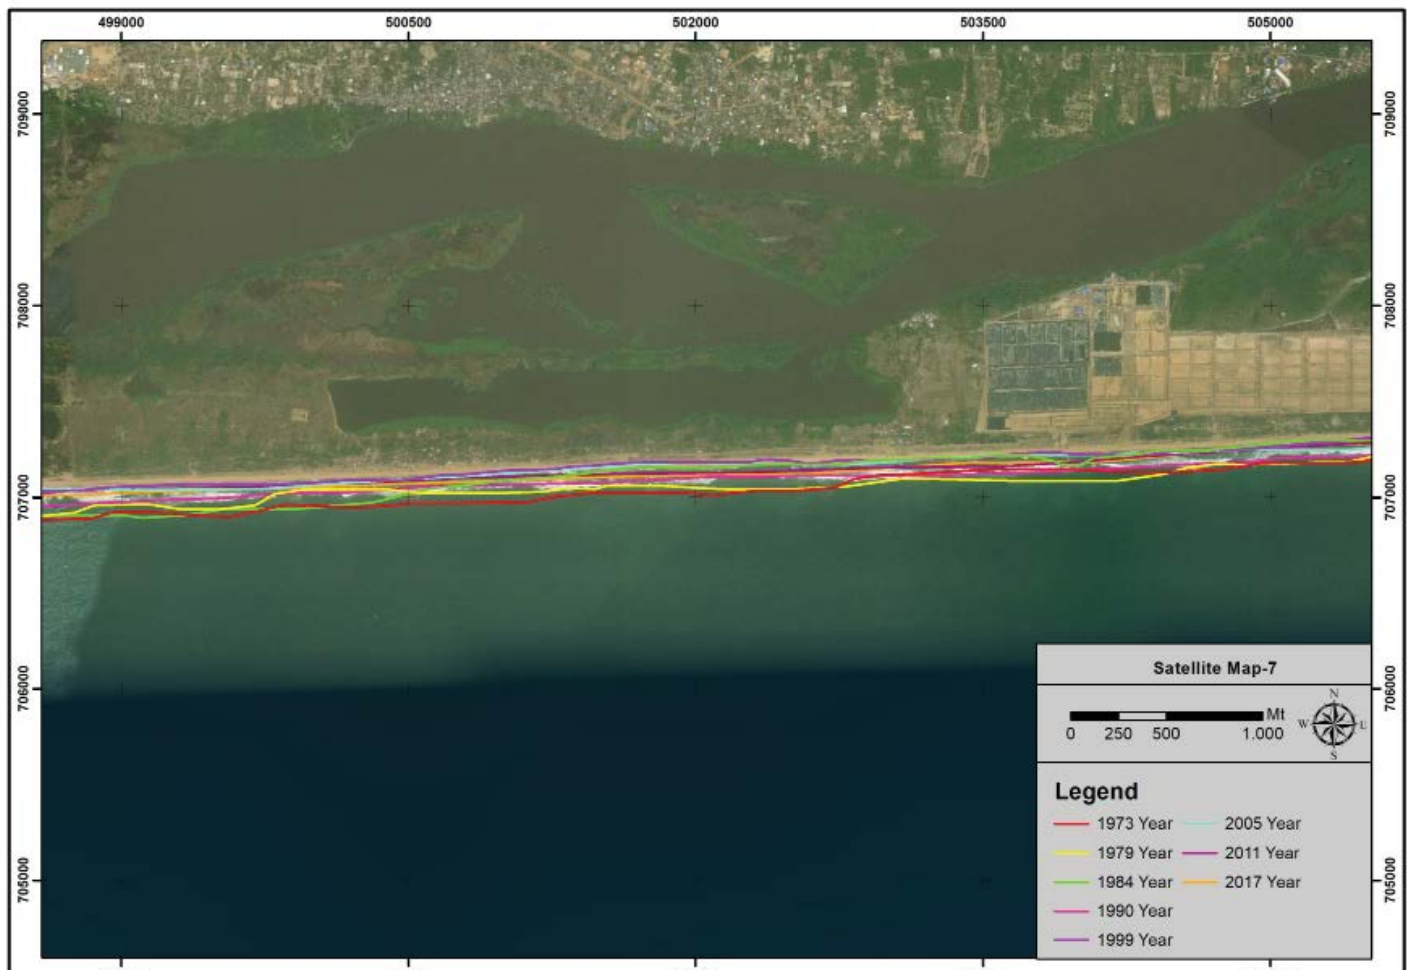

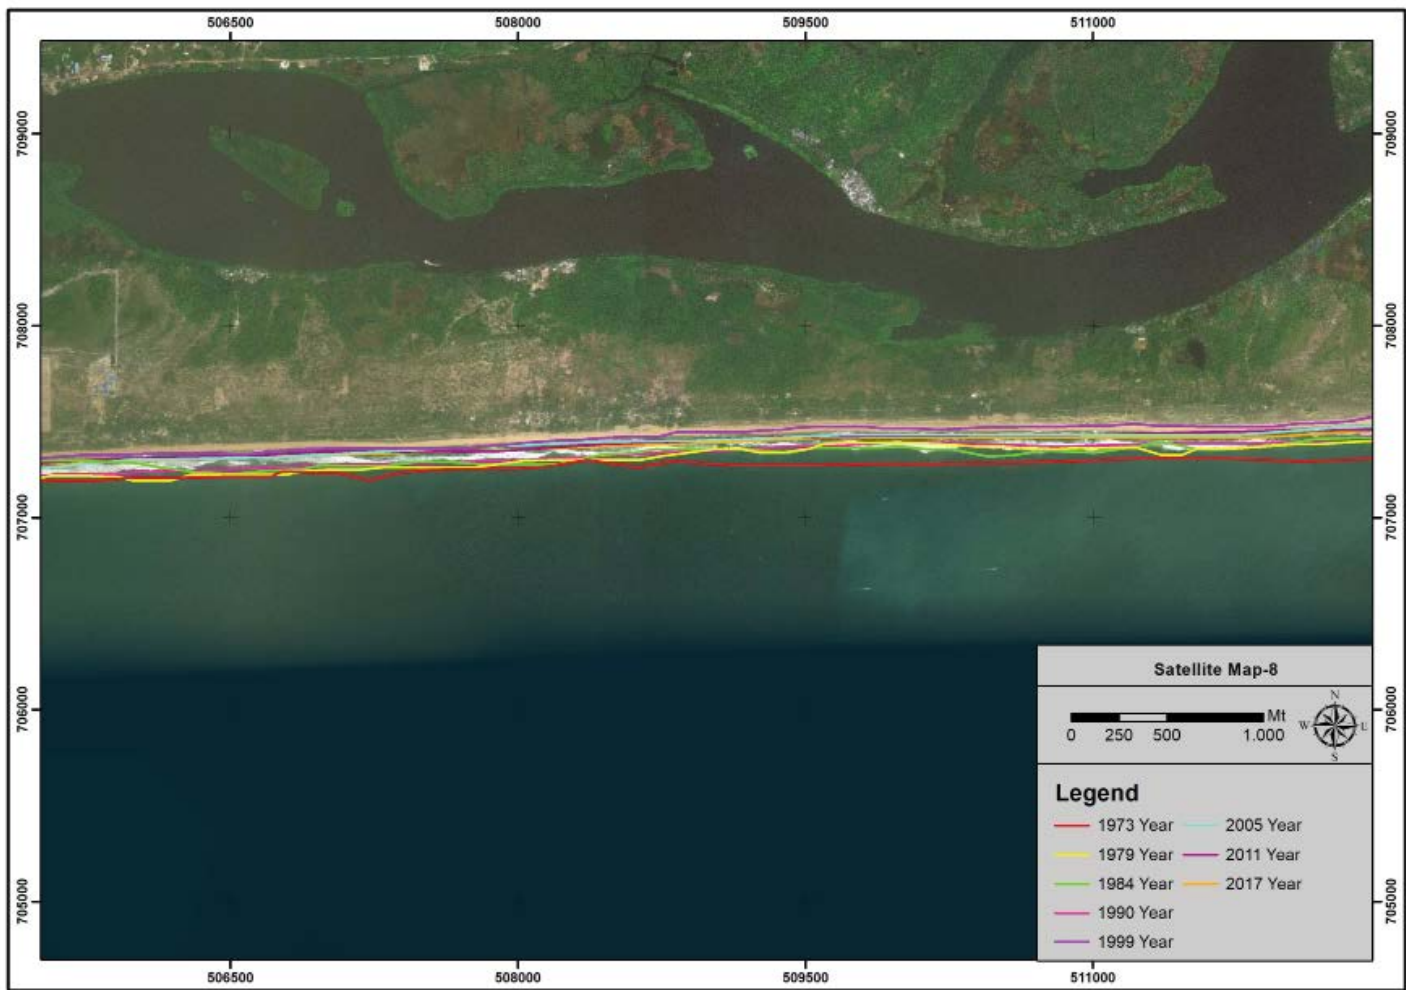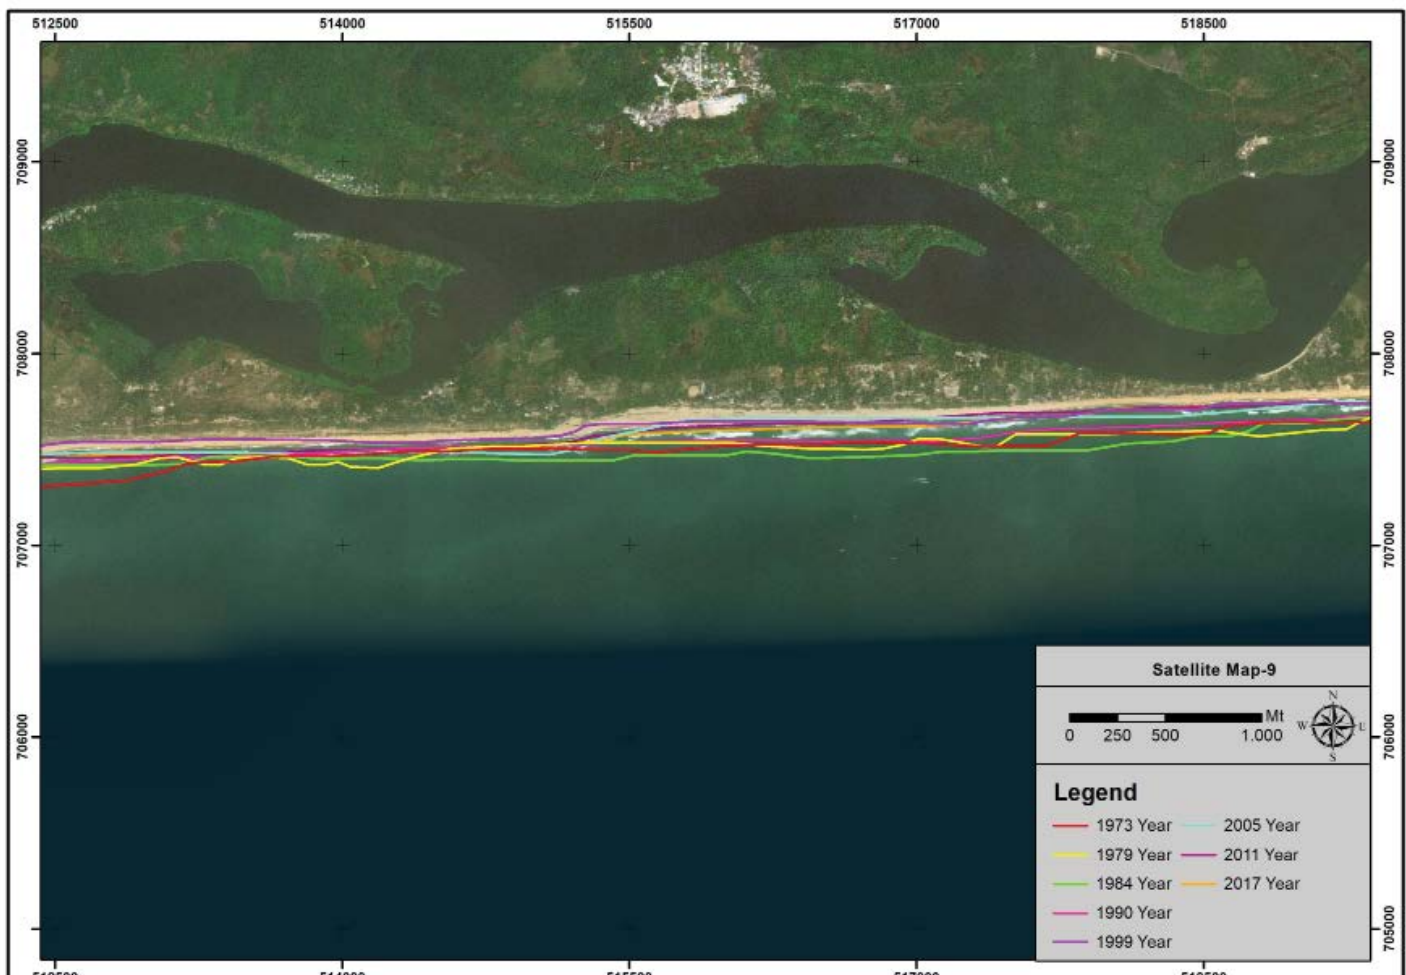

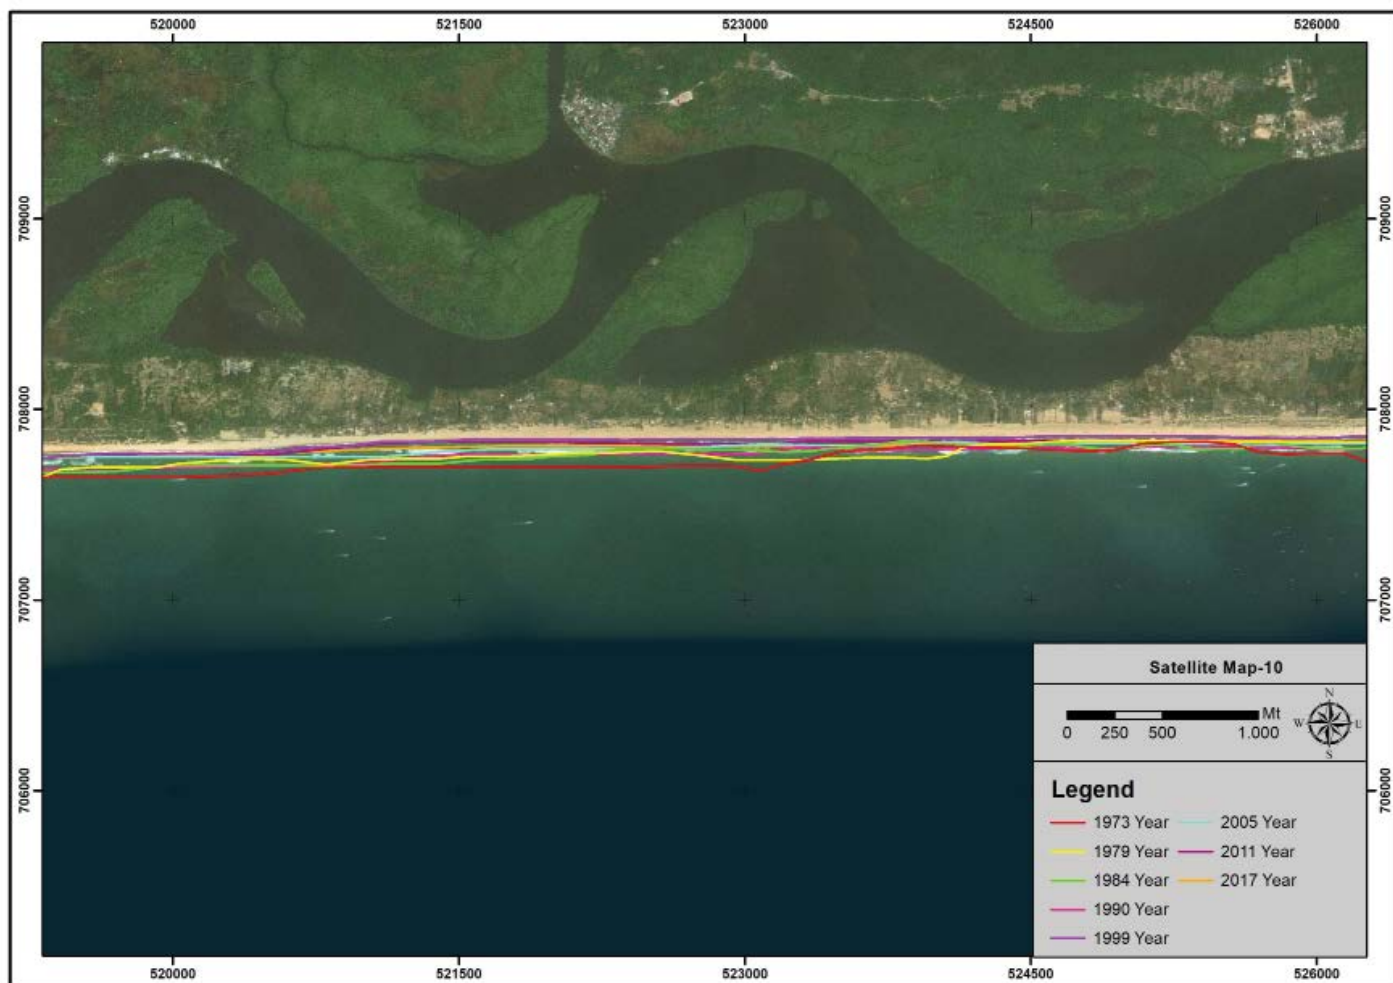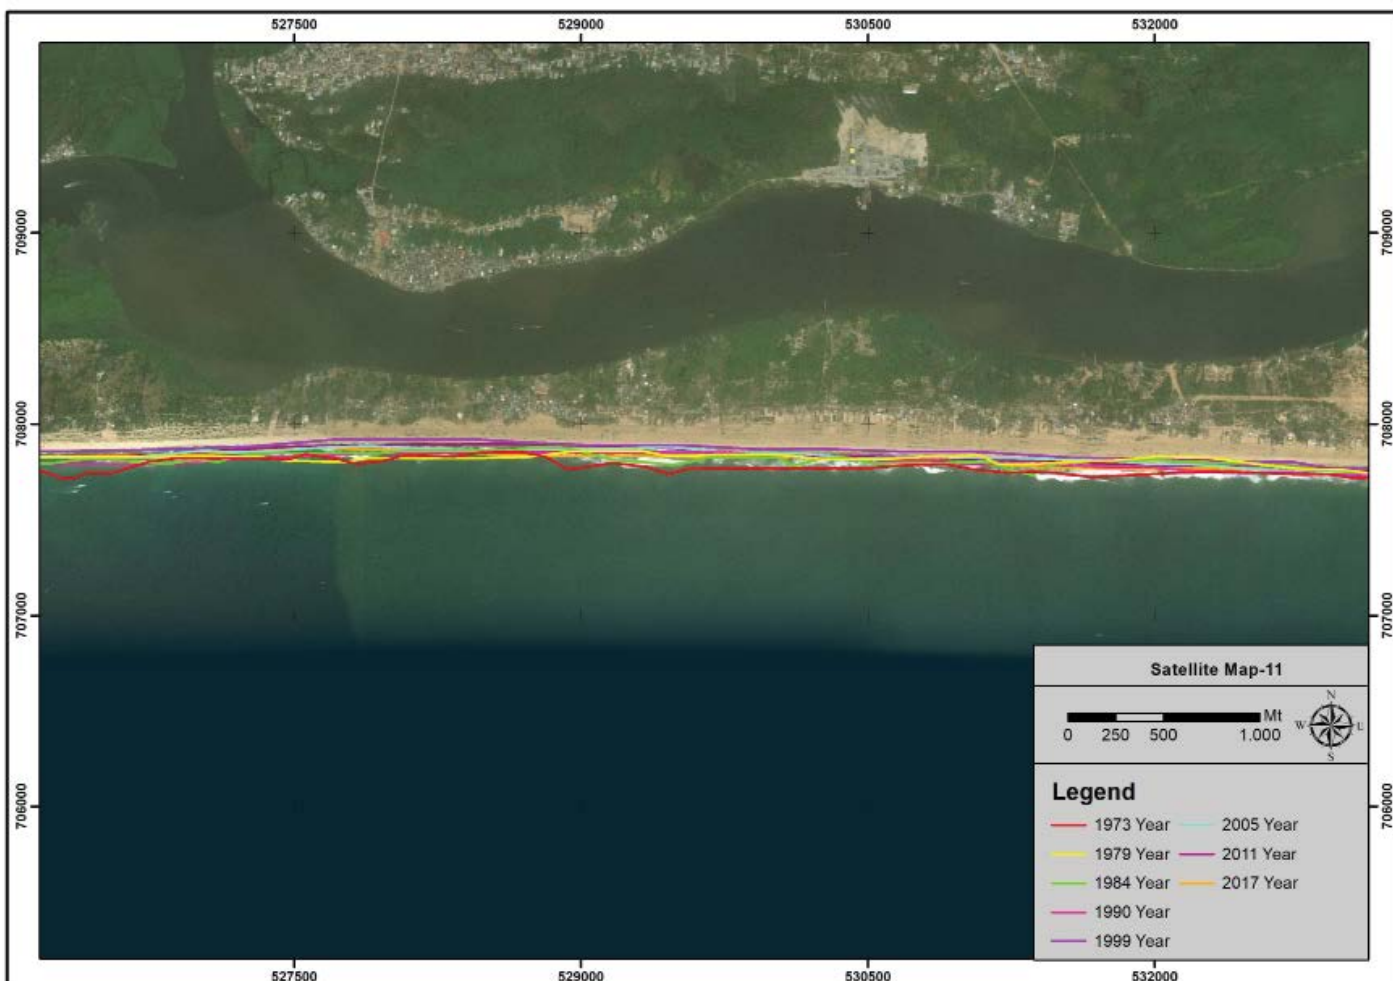

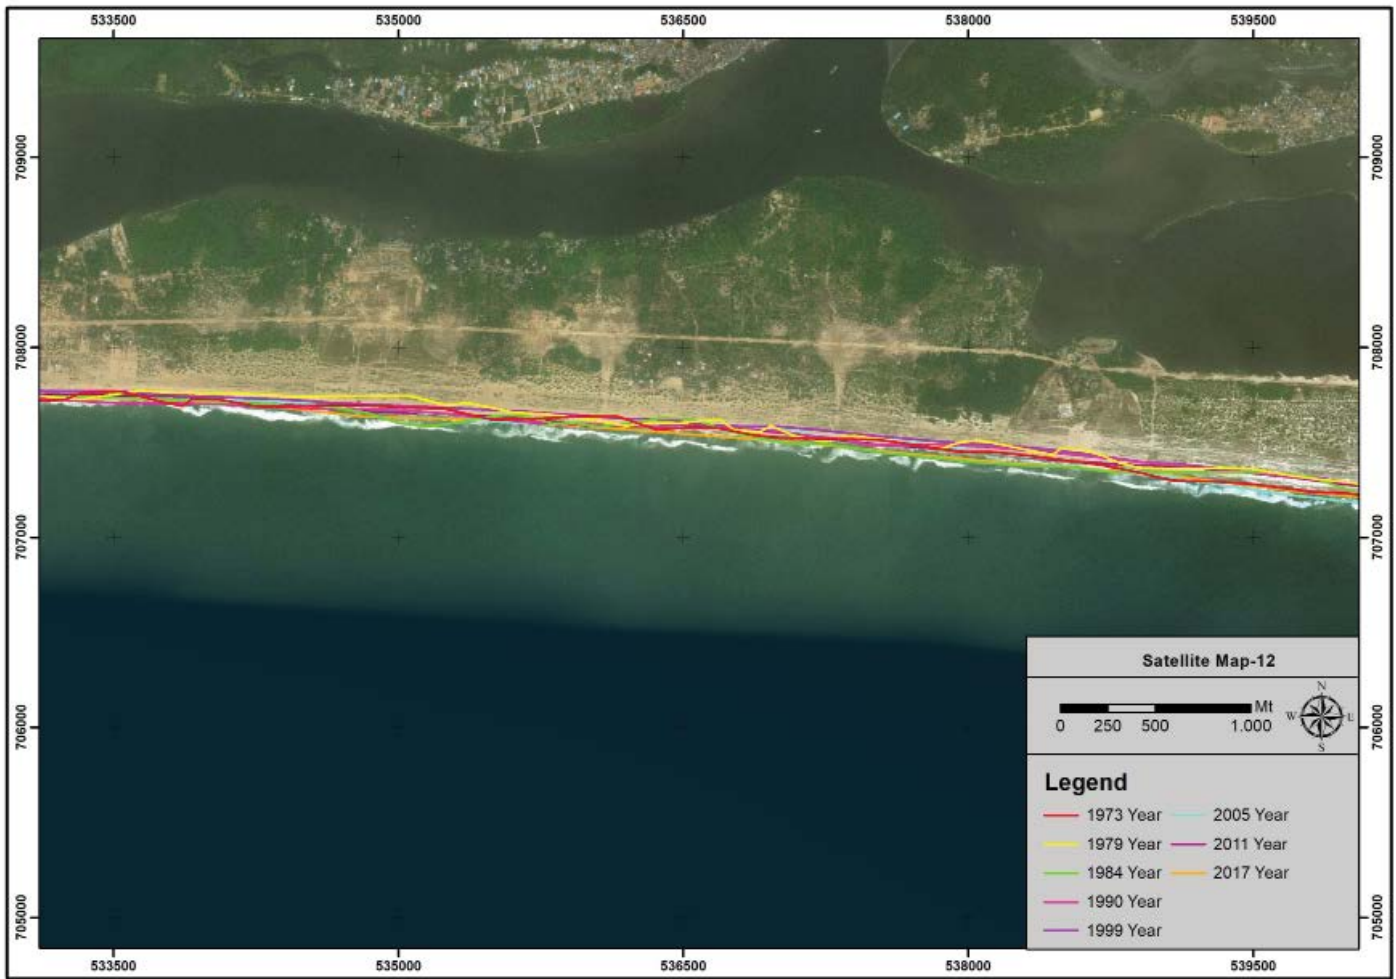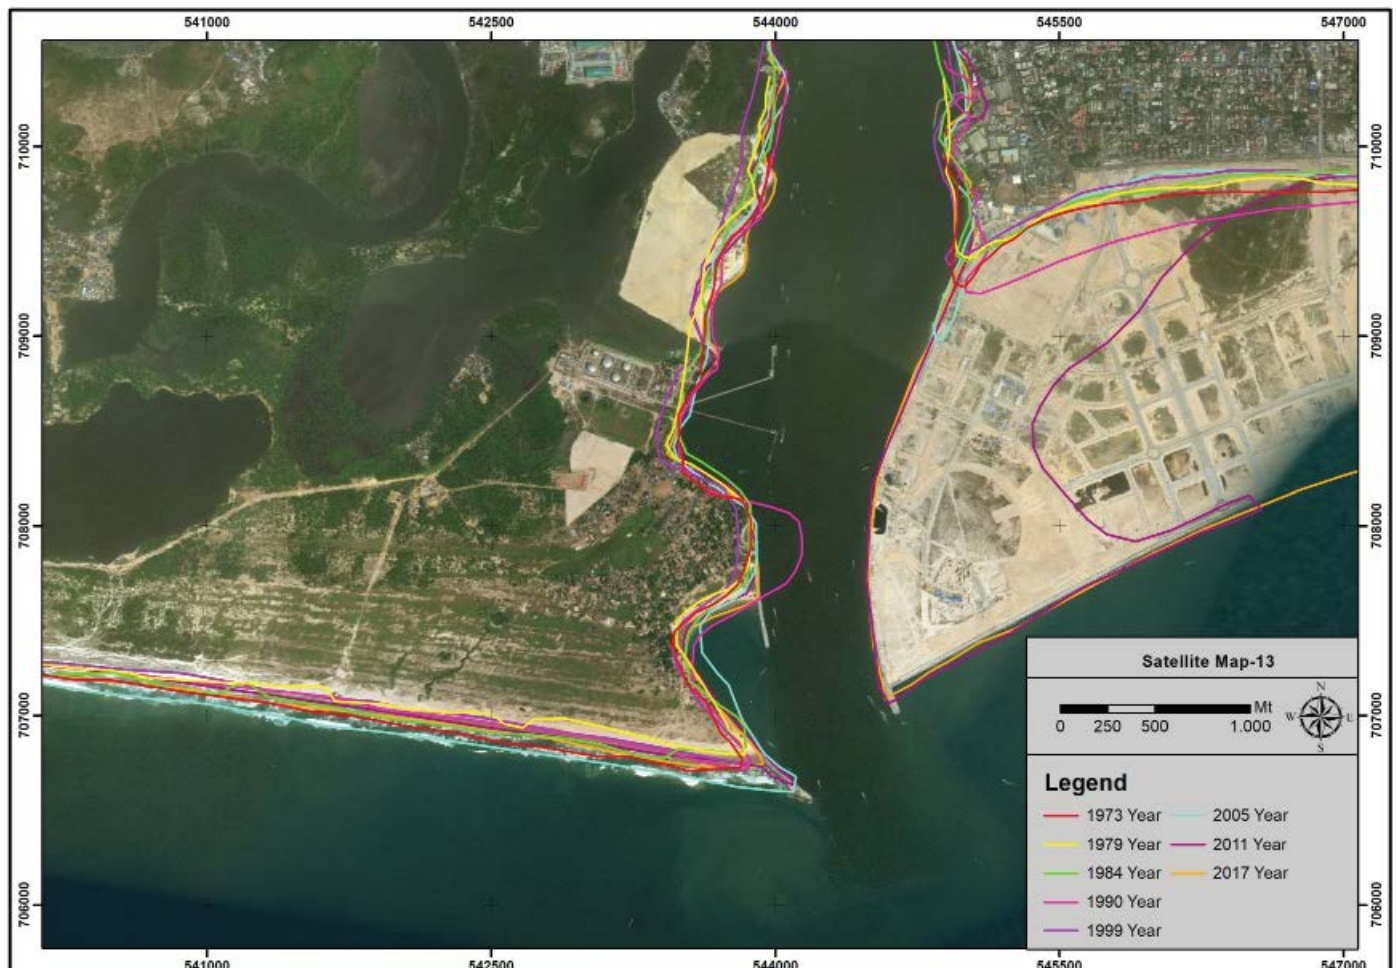

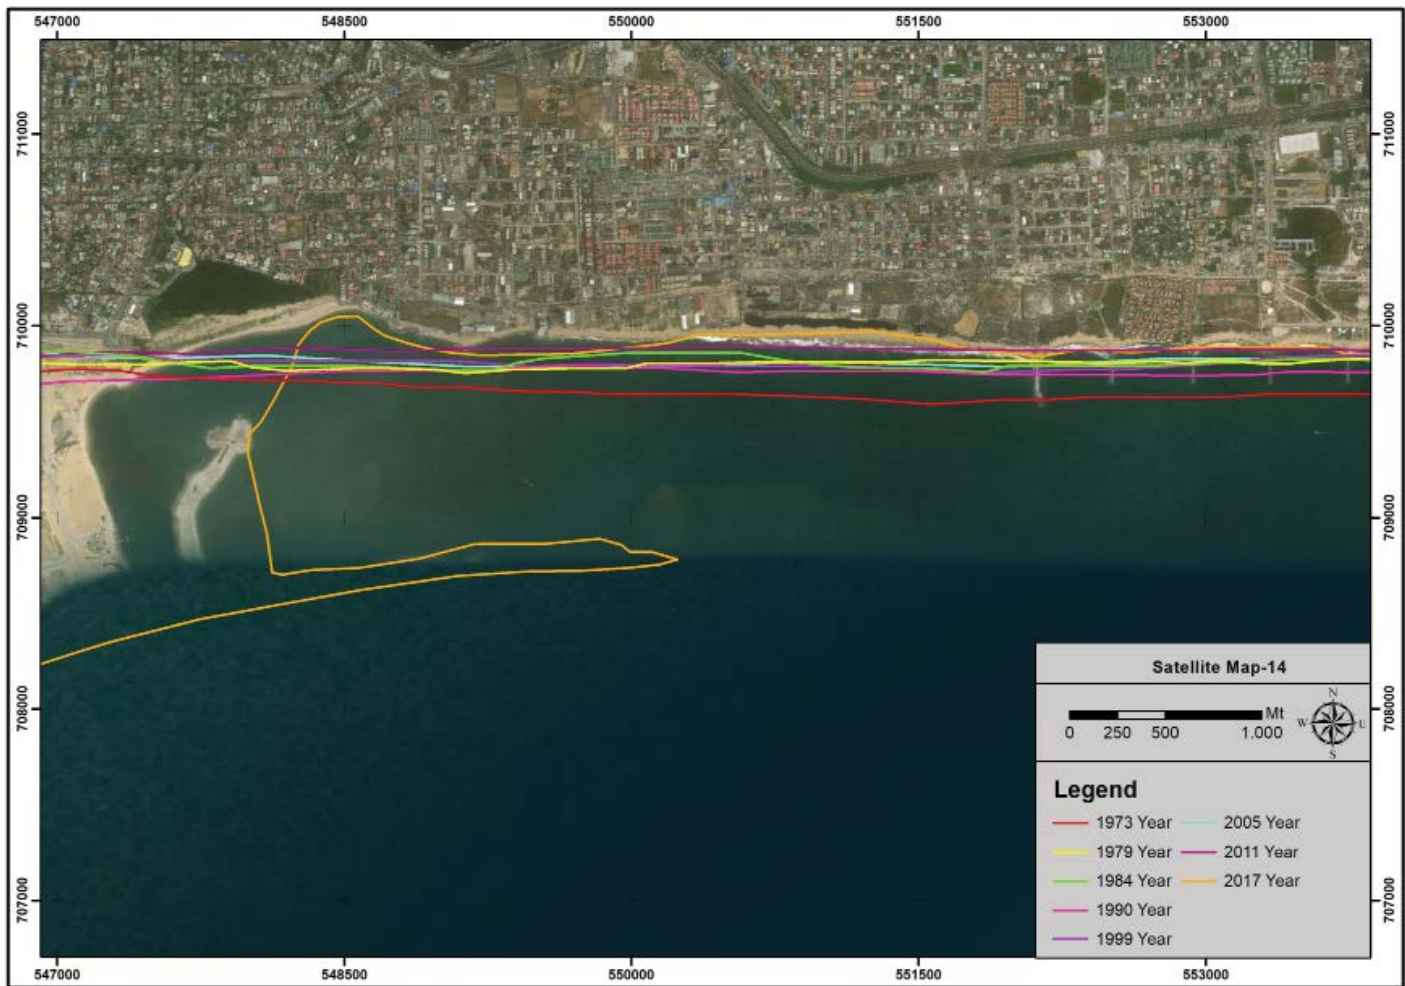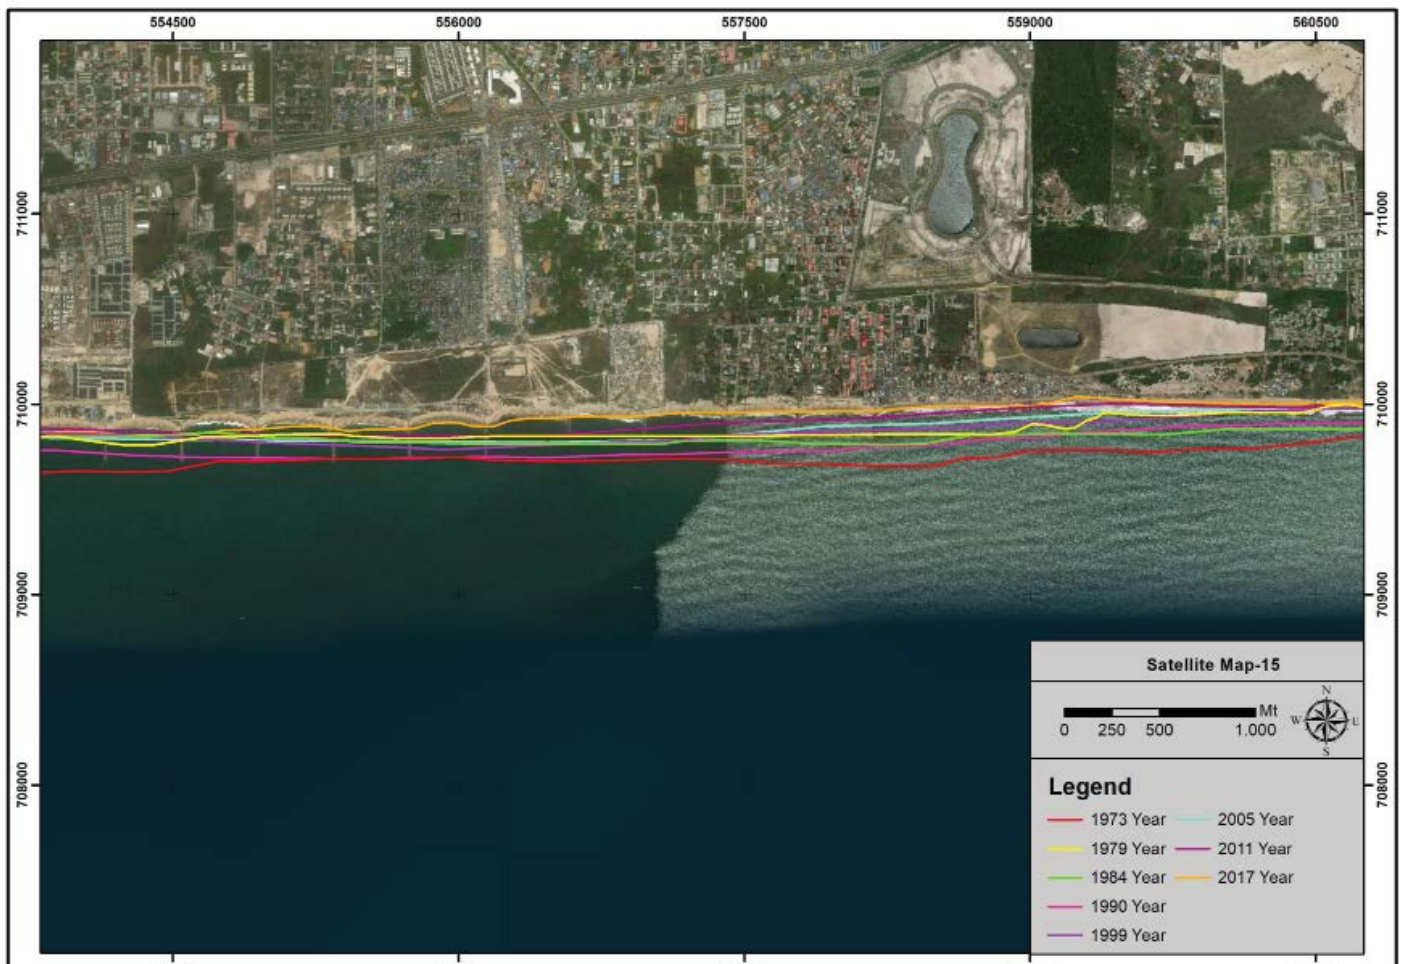

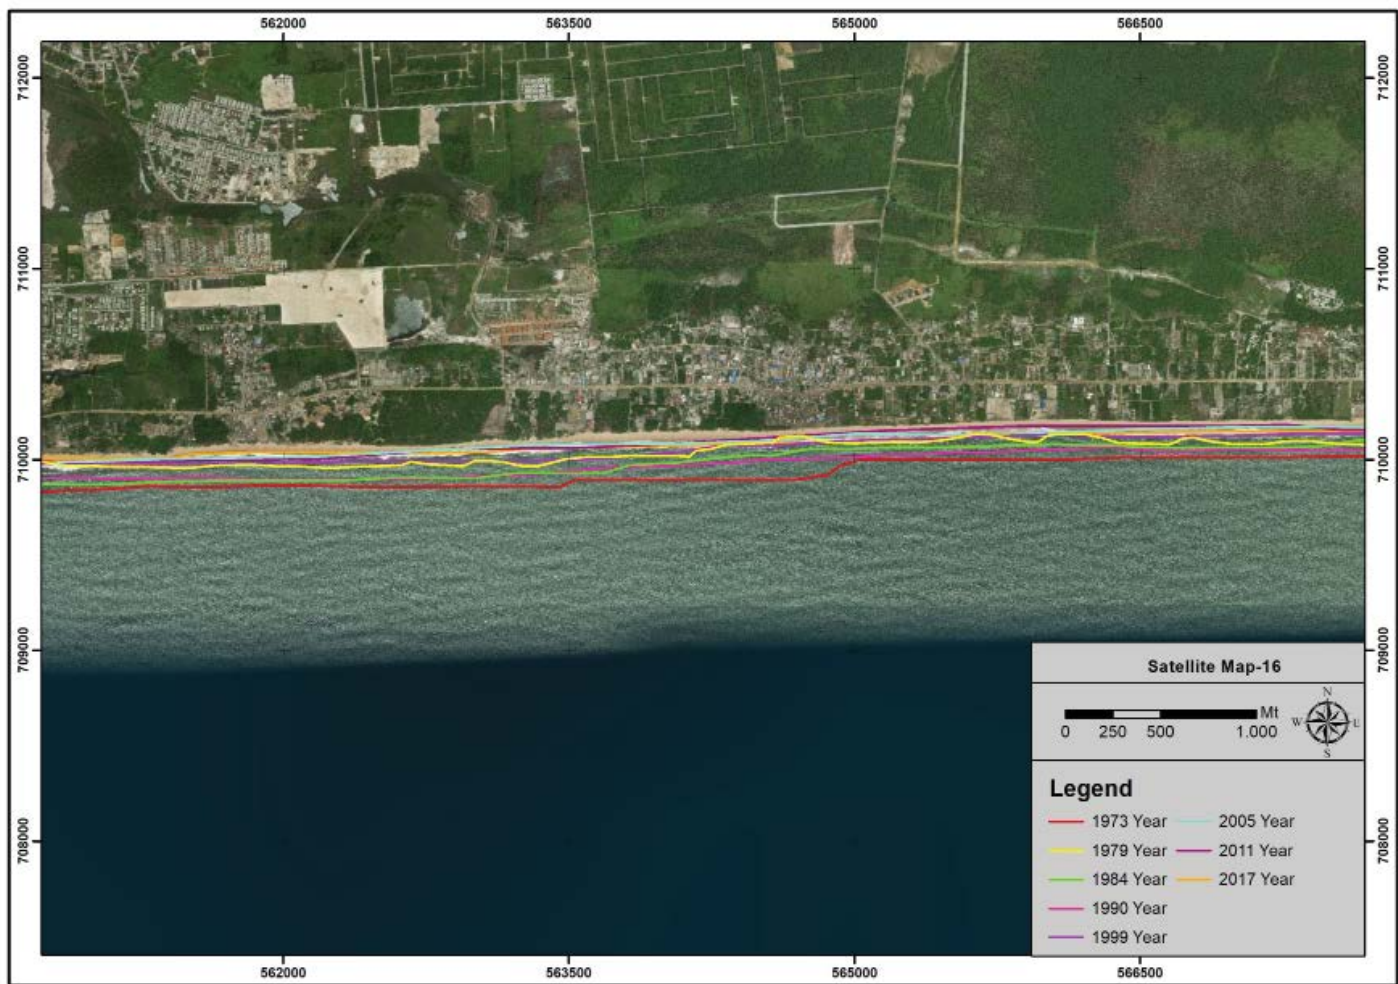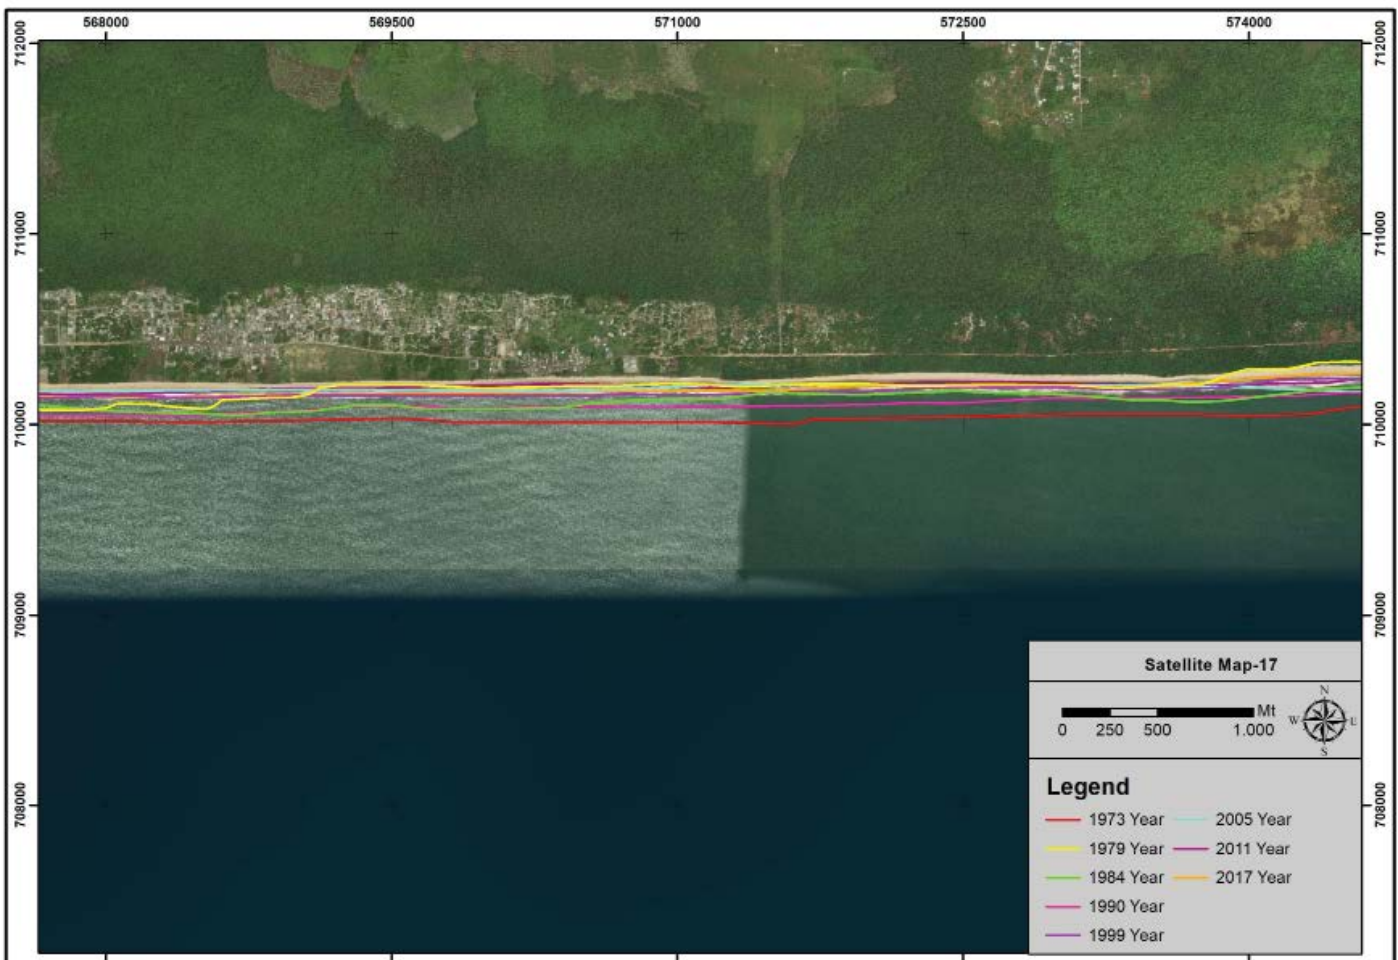

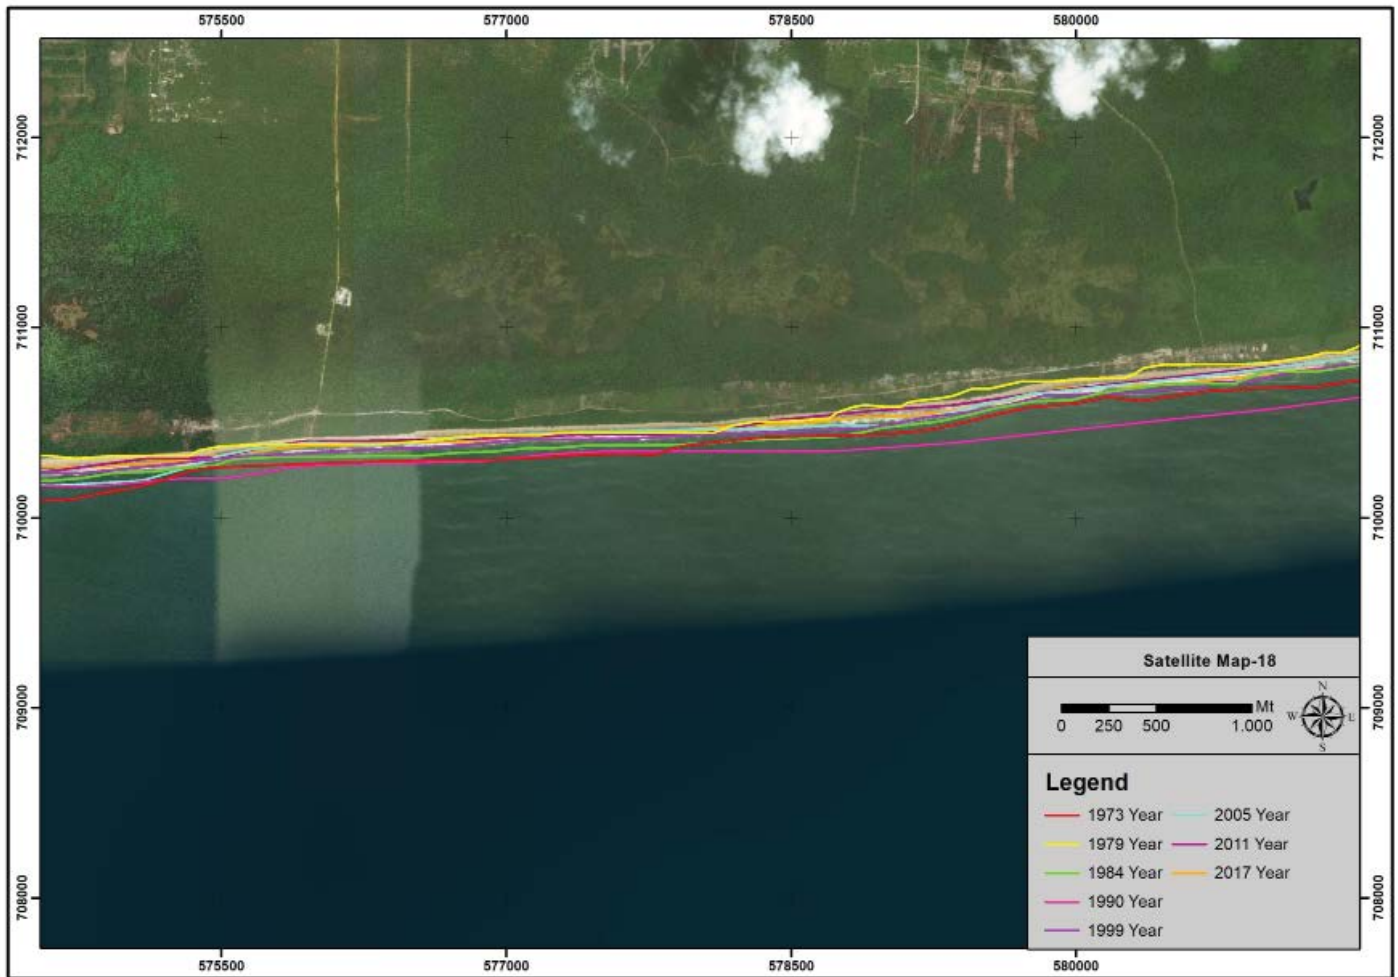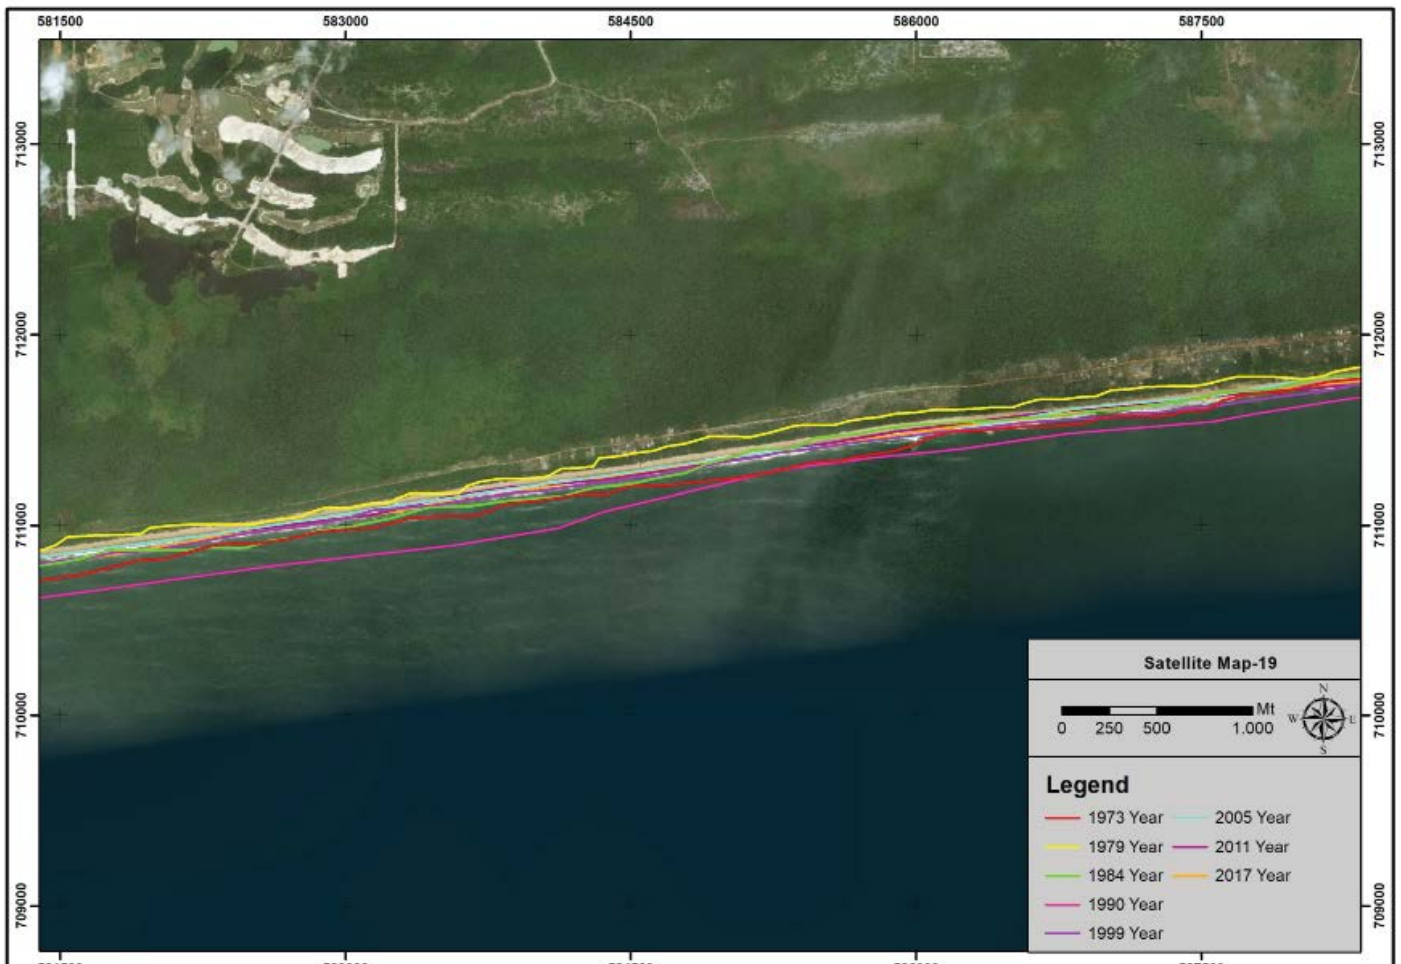

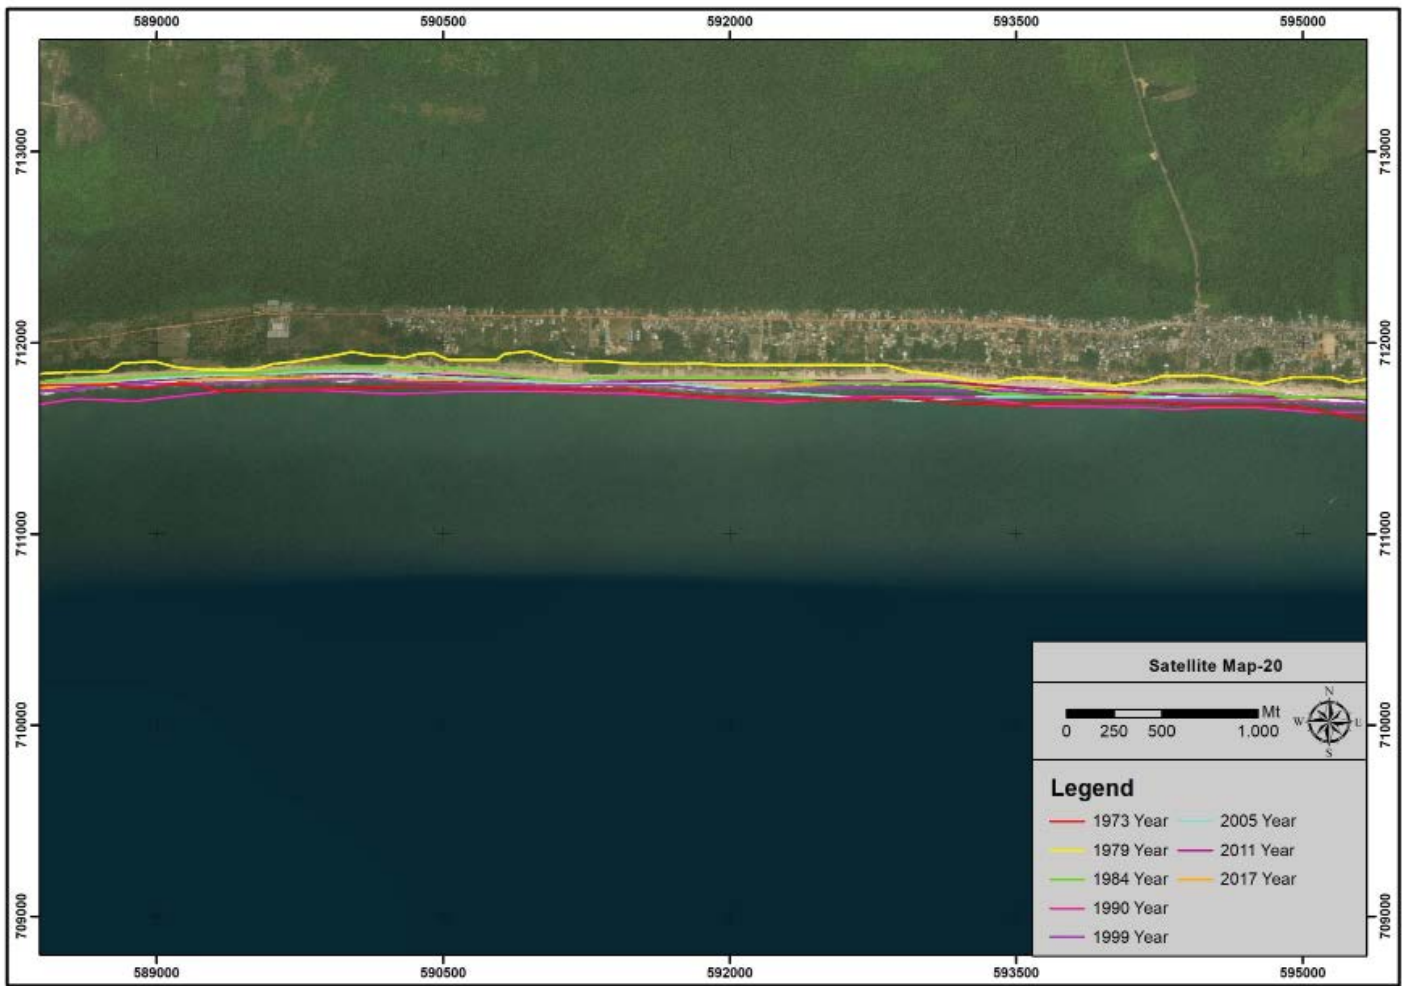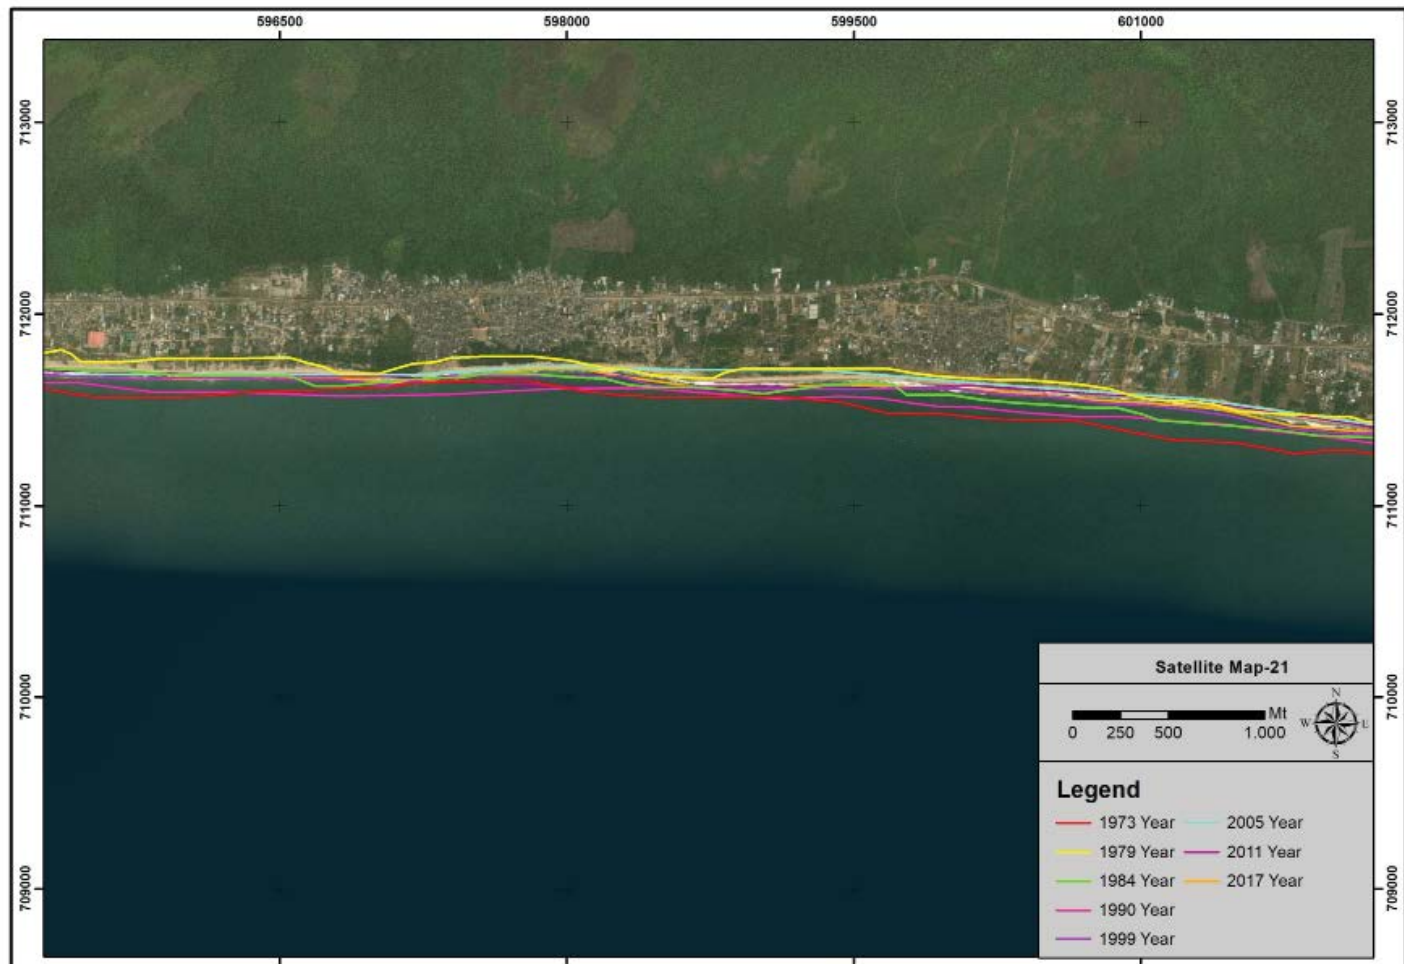

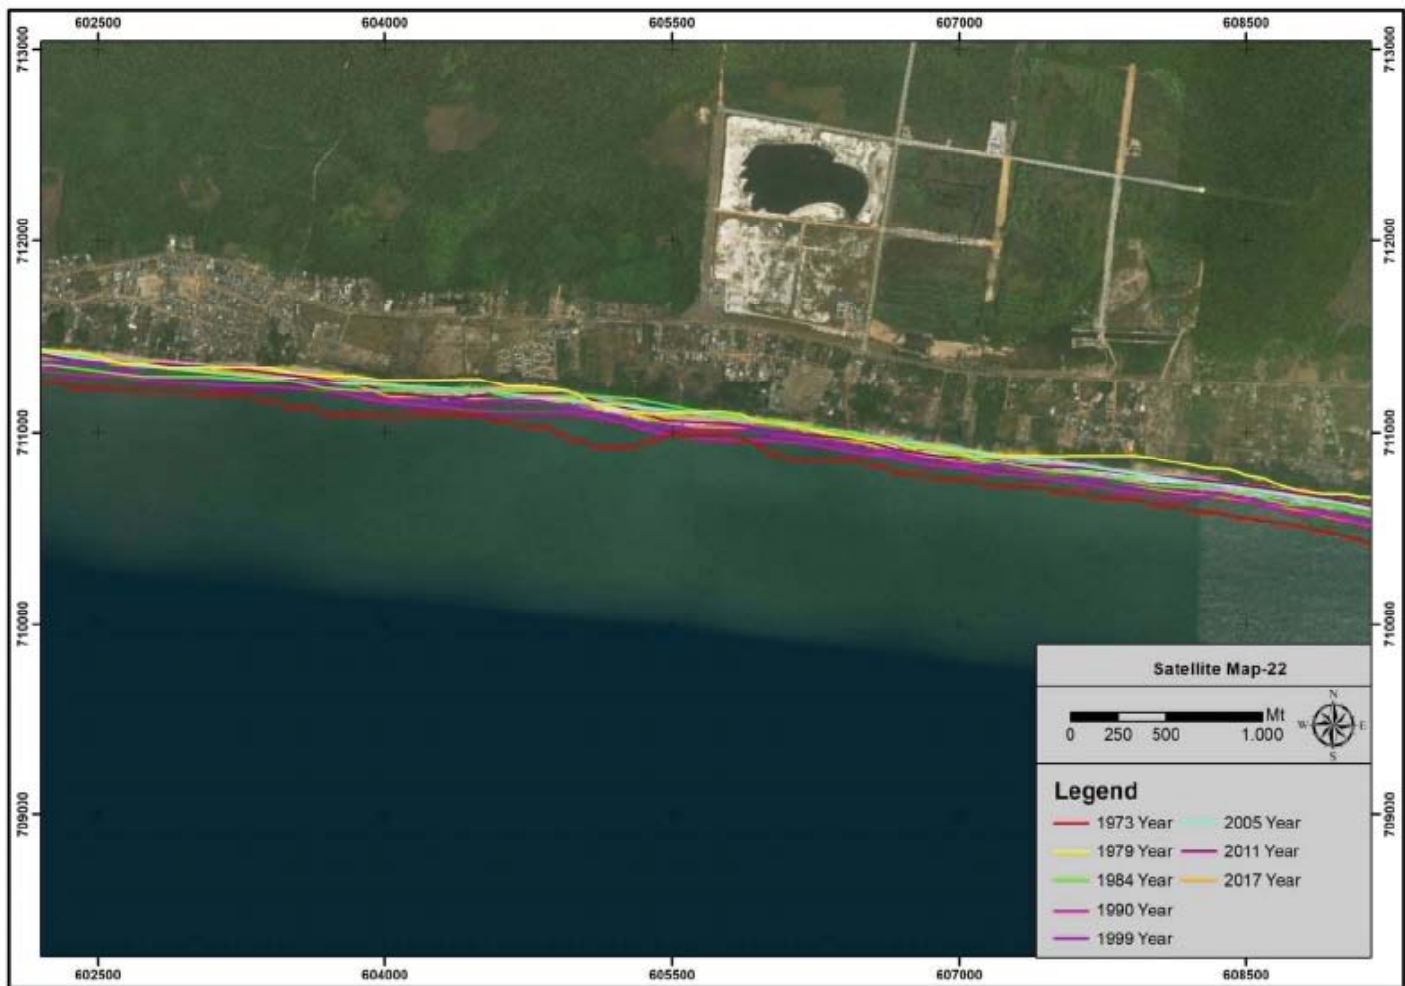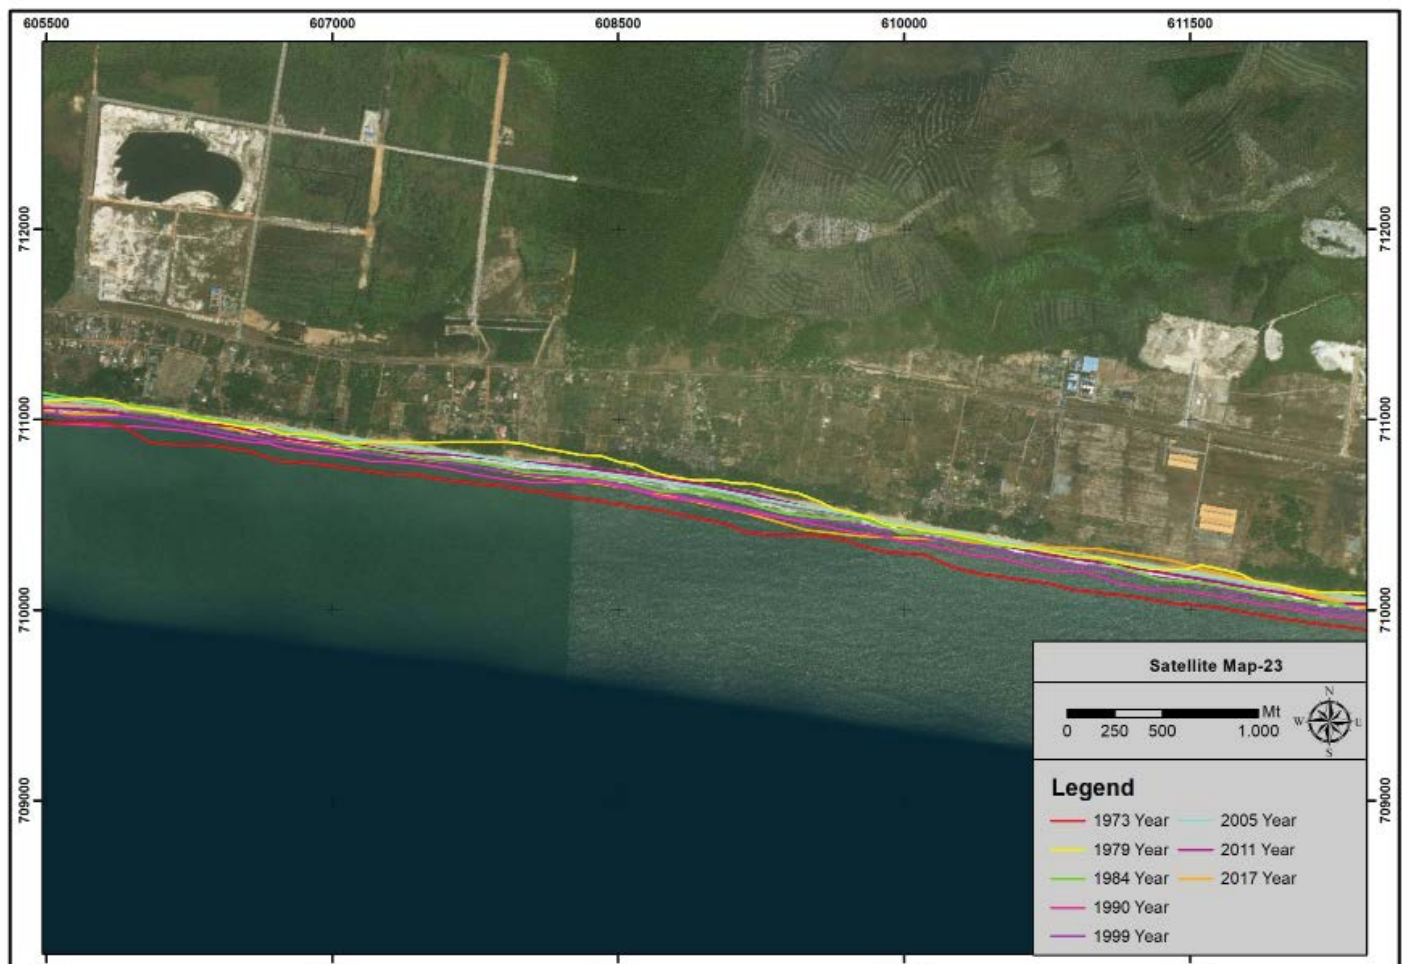

Supplement: Supplementary file 1 [file 22421655]
